# Supplementary material for: Effects of Dietary Nitrate Supplementation on Physiological Responses, Cognitive Function, and Exercise Performance at Moderate and Very-High Simulated Altitude
Source: PubMed Central journal article supplement (PMC5465306; doi:10.3389/fphys.2017.00401), 2017-06-09
Supplement: Table1.pdf [file Table1.pdf]

**Supplementary data Table 1.** Cognitive test results at 3000 m and 4300 m simulated altitude following BRJ and PLA supplementation

|                                                      | BRJ-3000m    | PLA-3000m    | BRJ-4300m     | PLA-4300m     | Significance ( <i>p</i> ) values |                         |                                   |
|------------------------------------------------------|--------------|--------------|---------------|---------------|----------------------------------|-------------------------|-----------------------------------|
|                                                      |              |              |               |               | Main effect of supplement        | Main effect of altitude | Supplement x altitude interaction |
| <b>AST: Number of correct responses</b>              |              |              |               |               |                                  |                         |                                   |
| Pre-exposure                                         | 154 (5)      | 155 (6)      | 154 (5)       | 155 (4)       | 0.587                            | 0.733                   | 0.633                             |
| Pre-exercise                                         | 154 (4)      | 151 (8)      | 153 (6)       | 152 (5)       | 0.427                            | 0.724                   | 0.342                             |
| Steady-state                                         | 152 (6)      | 154 (6)      | 152 (6)       | 151 (6)       | 0.942                            | 0.041*                  | 0.032*                            |
| Post-exercise                                        | 152 (6)      | 153 (5)      | 148 (10)      | 150 (5)       | 0.542                            | 0.053                   | 0.709                             |
| <b>AST: Response time (ms)</b>                       |              |              |               |               |                                  |                         |                                   |
| Pre-exposure                                         | 476.3 (54.8) | 474.7 (64.0) | 487.2 (64.5)  | 480.7 (66.6)  | 0.749                            | 0.440                   | 0.832                             |
| Pre-exercise                                         | 462.8 (32.9) | 481.4 (56.6) | 487.7 (49.9)  | 460.9 (49.4)  | 0.818                            | 0.833                   | 0.019*                            |
| Steady-state                                         | 484.5 (74.9) | 486.8 (62.5) | 512.9 (69.5)  | 521.8 (56.5)  | 0.695                            | 0.021*                  | 0.820                             |
| Post-exercise                                        | 466.1 (79.0) | 469.8 (79.6) | 514.5 (92.7)  | 503.0 (94.4)  | 0.769                            | 0.013*                  | 0.599                             |
| <b>RVP: Number of sequences correctly identified</b> |              |              |               |               |                                  |                         |                                   |
| Pre-exposure                                         | 48 (3)       | 48 (4)       | 46 (8)        | 48 (4)        | 0.628                            | 0.436                   | 0.383                             |
| Pre-exercise                                         | 47 (6)       | 45 (8)       | 45 (8)        | 47 (7)        | 0.943                            | 0.850                   | 0.062                             |
| Steady-state                                         | 49 (4)       | 48 (7)       | 47 (5)        | 47 (6)        | 0.409                            | 0.138                   | 0.834                             |
| Post-exercise                                        | 46 (6)       | 47 (7)       | 42 (7)        | 38 (7)        | 0.368                            | 0.011*                  | 0.176                             |
| <b>RVP: Response time (ms)</b>                       |              |              |               |               |                                  |                         |                                   |
| Pre-exposure                                         | 448.8 (84.5) | 429.4 (57.0) | 445.1 (117.0) | 440.9 (115.6) | 0.329                            | 0.794                   | 0.605                             |
| Pre-exercise                                         | 416.8 (40.5) | 436.4 (66.8) | 422.1 (69.5)  | 415.1 (69.4)  | 0.608                            | 0.474                   | 0.064                             |
| Steady-state                                         | 422.2 (58.6) | 424.3 (69.4) | 454.5 (82.6)  | 460.3 (96.0)  | 0.612                            | 0.025*                  | 0.923                             |
| Post-exercise                                        | 391.7 (36.4) | 383.7 (53.3) | 440.5 (60.3)  | 455.4 (84.4)  | 0.793                            | 0.000*                  | 0.496                             |
| <b>RVP: Number of false alarms</b>                   |              |              |               |               |                                  |                         |                                   |
| Pre-exposure                                         | 2 (2)        | 4 (4)        | 3 (3)         | 3 (2)         | 0.056                            | 0.904                   | 0.596                             |
| Pre-exercise                                         | 2 (2)        | 4 (2)        | 5 (5)         | 3 (3)         | 0.879                            | 0.251                   | 0.073                             |
| Steady-state                                         | 4 (3)        | 4 (5)        | 6 (8)         | 5 (4)         | 0.448                            | 0.321                   | 0.596                             |
| Post-exercise                                        | 4 (3)        | 3 (2)        | 5 (3)         | 7 (3)         | 0.560                            | 0.016*                  | 0.088                             |

| <b>SSP: Longest sequence correctly identified</b> |       |       |       |       |       |       |        |
|---------------------------------------------------|-------|-------|-------|-------|-------|-------|--------|
| Pre-exposure                                      | 8 (1) | 8 (1) | 8 (2) | 8 (2) | 0.269 | 0.055 | 0.555  |
| Pre-exercise                                      | 9 (1) | 8 (1) | 9 (1) | 8 (1) | 0.195 | 0.342 | 0.483  |
| Steady-state                                      | 8 (1) | 8 (1) | 8 (1) | 8 (1) | 0.452 | 0.104 | 0.758  |
| Post-exercise                                     | 9 (1) | 8 (1) | 8 (1) | 8 (2) | 0.684 | 0.098 | 0.141  |
| <b>SSP: Mean number of attempts to pass</b>       |       |       |       |       |       |       |        |
| Pre-exposure                                      | 1 (0) | 1 (0) | 1 (0) | 1 (0) | 0.169 | 1.000 | 1.000  |
| Pre-exercise                                      | 1 (0) | 1 (0) | 1 (0) | 1 (0) | 0.347 | 0.347 | 0.316  |
| Steady-state                                      | 1 (0) | 1 (0) | 1 (0) | 1 (0) | 0.141 | 0.415 | 0.415  |
| Post-exercise                                     | 1 (0) | 1 (0) | 1 (0) | 1 (0) | 0.794 | 0.504 | 0.040* |

Data is presented as mean (SD) for n = 10 for pre-exposure, steady-state and post-exercise measurement periods, and n = 9 for the pre-exercise measurement period. \* denotes  $p < 0.05$ .
